# Supplementary material for: High interspecific variability indicates pollen ice nucleators are incidental
Source: Copernicus journal article supplement (doi:10.5194/egusphere-2023-2705), 2024-01-02
Supplement: Supplementary file 1 [file egusphere-2023-2705-supplement.pdf]

**Table S1: Details of pollen collections and classifications.**

| Species                                                        | Family        | Order          | Location*                        | Date                  | T <sub>50</sub> /<br>conc. | T <sub>rep</sub> | Sub-division | Biome                   | Poll.<br>season   | Poll.<br>method | Elevation<br>category | Low<br>elevation | High<br>elevation | Desicc.<br>tolerance |
|----------------------------------------------------------------|---------------|----------------|----------------------------------|-----------------------|----------------------------|------------------|--------------|-------------------------|-------------------|-----------------|-----------------------|------------------|-------------------|----------------------|
| <i>Abies balsamea</i> (L.) Mill.                               | Pinaceae      | Pinales        | Wakehurst Place                  | 09/04/22              | -12.6 °C /<br>2 wt%        | -13.6 °C         | Gymnosperm   | Temperate               | Spring            | Wind            | Moderate              | 0                | 1900              | --                   |
| <i>Acer pseudoplatanus</i> L.                                  | Sapindaceae   | Sapindales     | Podivín, Czech Republic          | 22/04/18-<br>23/04/18 | -16.6 °C /<br>2 wt%        | -17.7 °C         | Angiosperm   | Temperate               | Spring            | Animal          | Moderate              | 200              | 1500              | DT                   |
| <i>Alnus glutinosa</i> (L.) Gaertn.                            | Betulaceae    | Fagales        | **                               | **                    | -16.3 °C /<br>2 wt%        | -17.7 °C         | Angiosperm   | Temperate               | Spring            | Wind            | Moderate              | 0                | 1800              | DS                   |
| <i>Amaranthus hybridus</i> L.                                  | Amaranthaceae | Caryophyllales | Třebíč, Czech Republic           | 09/08/22-<br>07/09/22 | -17.5 °C /<br>2 wt%        | -19.6 °C         | Angiosperm   | Seasonally dry tropical | Summer            | Wind            | Low                   | 0                | 300               | --                   |
| <i>Araucaria araucana</i> (Molina) K.Koch                      | Araucariaceae | Araucariales   | Kew Gardens                      | 02/06/21              | -16.6 °C /<br>2 wt%        | -17.4 °C         | Gymnosperm   | Temperate               | Summer            | Wind            | Moderate              | 600              | 2000              | --                   |
| <i>Arundo formosana</i> Hack.                                  | Poaceae       | Poales         | Kew Gardens                      | 01/09/21              | -21.0 °C /<br>0.2 wt%      | -19.6 °C         | Angiosperm   | Subtropical             | Summer            | Wind            | Moderate              | 0                | 1800              | --                   |
| <i>Betula alleghaniensis</i> Britton                           | Betulaceae    | Fagales        | Wakehurst Place                  | 03/04/22              | -9.0 °C /<br>2 wt%         | -10.7 °C         | Angiosperm   | Temperate               | Spring            | Wind            | Moderate              | 300              | 1900              | DT                   |
| <i>Betula x caerulea</i> Blanch.                               | Betulaceae    | Fagales        | Wakehurst Place                  | 03/04/22              | -9.0 °C /<br>2 wt%         | -11.4 °C         | Angiosperm   | Temperate               | Spring            | Wind            | Low                   | 500              | 500               | --                   |
| <i>Betula ermanii</i> Cham.                                    | Betulaceae    | Fagales        | Wakehurst Place                  | 09/04/22              | -15.2 °C /<br>2 wt%        | -16.8 °C         | Angiosperm   | Temperate               | Spring            | Wind            | High                  | 1600             | 2900              | --                   |
| <i>Betula pendula</i> Roth                                     | Betulaceae    | Fagales        | České Budějovice, Czech Republic | 08/04/20-<br>10/04/20 | -16.0 °C /<br>2 wt%        | -16.5 °C         | Angiosperm   | Temperate               | Spring            | Wind            | Moderate              | 0                | 1500              | --                   |
| <i>Betula utilis</i> subsp. <i>jacquemontii</i> (Spach) Kitam. | Betulaceae    | Fagales        | Wakehurst Place                  | 03/04/22              | -8.6 °C /<br>2 wt%         | -9.7 °C          | Angiosperm   | Temperate               | Spring            | Wind            | High                  | 2700             | 3900              | --                   |
| <i>Camellia reticulata</i> Lindl.                              | Theaceae      | Ericales       | Kew Gardens                      | 02/12/21              | -21.9 °C /<br>0.2 wt%      | -20.8 °C         | Angiosperm   | Subtropical             | Autumn/<br>Winter | Animal          | High                  | 1800             | 2500              | --                   |
| <i>Camellia saluenensis</i> Stapf ex Bean                      | Theaceae      | Ericales       | Kew Gardens                      | 02/12/21              | -20.5 °C /<br>0.2 wt%      | -19.3 °C         | Angiosperm   | Temperate               | Autumn/<br>Winter | Animal          | High                  | 1900             | 3200              | --                   |
| <i>Carpinus betulus</i> L.                                     | Betulaceae    | Fagales        | Wakehurst Place                  | 03/04/23              | -15.8 °C /<br>2 wt%        | -17.3 °C         | Angiosperm   | Temperate               | Spring            | Wind            | Moderate              | 0                | 1800              | --                   |
| <i>Carpinus cordata</i> Blume                                  | Betulaceae    | Fagales        | Wakehurst Place                  | 04/04/23              | -16.0 °C /<br>2 wt%        | -18.4 °C         | Angiosperm   | Temperate               | Spring            | Wind            | High                  | 200              | 2500              | --                   |
| <i>Cedrus atlantica</i> (Endl.) Manetti ex CarriPre            | Pinaceae      | Pinales        | Kew Gardens                      | 02/12/21              | -8.8 °C /<br>2 wt%         | -10.6 °C         | Gymnosperm   | Temperate               | Autumn/<br>Winter | Wind            | High                  | 1300             | 2600              | --                   |
| <i>Cedrus atlantica</i> f. <i>glauca</i> (CarriPre) Beissn.    | Pinaceae      | Pinales        | Kew Gardens                      | 02/12/21              | -12.9 °C /<br>2 wt%        | -16.8 °C         | Gymnosperm   | Temperate               | Autumn/<br>Winter | Wind            | High                  | 1300             | 2600              | --                   |
| <i>Cedrus deodara</i> (Roxb. ex D.Don) G.Don                   | Pinaceae      | Pinales        | Leamington Spa                   | 05/12/21              | -15.2 °C /<br>2 wt%        | -17.4 °C         | Gymnosperm   | Temperate               | Autumn/<br>Winter | Wind            | High                  | 1200             | 3000              | --                   |
| <i>Cestrum fasciculatum</i> (Schltdl.) Miers                   | Solanaceae    | Solanales      | Kew Gardens Glasshouses          | 02/12/21              | -23.6 °C /<br>0.2 wt%      | -21.0 °C         | Angiosperm   | Seasonally dry tropical | Summer            | Animal          | Low                   | 0                | 1000              | --                   |
| <i>Clerodendrum speciosissimum</i> Jacob-Makoy                 | Lamiaceae     | Lamiales       | Kew Gardens Glasshouses          | 01/09/21              | -21.5 °C /<br>0.2 wt%      | -20.0 °C         | Angiosperm   | Wet tropical            | Summer            | Animal          | Moderate              | 0                | 1500              | --                   |

|                                                                                      |                |              |                                        |                       |                        |          |            |                            |                   |        |          |      |      |    |
|--------------------------------------------------------------------------------------|----------------|--------------|----------------------------------------|-----------------------|------------------------|----------|------------|----------------------------|-------------------|--------|----------|------|------|----|
| <i>Corylus avellana</i> L.                                                           | Betulaceae     | Fagales      | **                                     | **                    | -17.9 °C /<br>2 wt%    | -19.1 °C | Angiosperm | Temperate                  | Autumn/<br>Winter | Wind   | Low      | 0    | 1020 | DS |
| <i>Crocus vernus</i> (L.) Hill                                                       | Iridaceae      | Asparagales  | Leamington Spa                         | 25/02/21              | -12.1 °C /<br>2 wt%    | -13.1 °C | Angiosperm | Temperate                  | Spring            | Animal | Moderate | 600  | 1600 | -- |
| <i>Cupressus sempervirens</i> L.                                                     | Cupressaceae   | Cupressales  | Alcoy, Spain                           | 27/02/21              | -19.3 °C /<br>2 wt%    | -20.6 °C | Gymnosperm | Temperate                  | Spring            | Wind   | Low      | 350  | 1100 | -- |
| <i>Cynosurus cristatus</i> L.                                                        | Pooideae       | Poales       | Wakehurst<br>Place                     | 30/06/21              | -17.7 °C /<br>0.2 wt%  | -17.1 °C | Angiosperm | Temperate                  | Summer            | Wind   | Low      | 0    | 800  | -- |
| <i>Dactylis glomerata</i> L.                                                         | Pooideae       | Poales       | Cheb, Czech<br>Republic                | 15/06/21-<br>17/06/21 | -17.1 °C /<br>2 wt%    | -18.9 °C | Angiosperm | Temperate                  | Summer            | Wind   | Moderate | 0    | 2400 | -- |
| <i>Encephalartos equatorialis</i><br>P.J.H.Hurter                                    | Zamiaceae      | Cycadales    | Nong Nooch<br>Bot. Garden,<br>Thailand | 11/03/19              | -19.7 °C /<br>0.2 wt%  | -18.7 °C | Gymnosperm | Seasonally<br>dry tropical | Summer            | Animal | Moderate | 1000 | 1000 | -- |
| <i>Erica multiflora</i> L.                                                           | Ericaceae      | Ericales     | Alcoy, Spain                           | 27/02/21              | -15.9 °C /<br>2 wt%    | -17.3 °C | Angiosperm | Subtropical                | Autumn/<br>Winter | Animal | Low      | 0    | 1200 | -- |
| <i>Hedychium coronarium</i><br>J.Koenig                                              | Zingiberaceae  | Zingiberales | Kew Gardens<br>Glasshouses             | 01/09/21              | -19.3 °C /<br>0.2 wt%  | -17.5 °C | Angiosperm | Subtropical                | Summer            | Animal | High     | 0    | 2500 | -- |
| <i>Helianthus annuus</i> L.                                                          | Asteraceae     | Asterales    | Břeclav, Czech<br>Republic             | 15/06/18-<br>27/06/18 | -16.0 °C /<br>2 wt%    | -21.3 °C | Angiosperm | Temperate                  | Summer            | Animal | Moderate | 0    | 1500 | DT |
| <i>Hordeum vulgare</i> L.                                                            | Poaceae        | Poales       | České<br>Budějovice,<br>Czech Republic | 18/06/18              | -20.0 °C /<br>2 wt%    | -21.2 °C | Angiosperm | Temperate                  | Summer            | Wind   | Moderate | 0    | 1500 | -- |
| <i>Hymenocallis littoralis</i><br>(Jacq.) Salisb.                                    | Amaryllidaceae | Asparagales  | Kew Gardens<br>Glasshouses             | 01/09/21              | -17.33 °C /<br>0.2 wt% | -8.9 °C  | Angiosperm | Wet tropical               | Summer            | Animal | Moderate | 0    | 1400 | -- |
| <i>Juglans regia</i> L.                                                              | Juglandaceae   | Fagales      | Břeclav, Czech<br>Republic             | 22/04/16-<br>23/04/16 | -18.9 °C /<br>2 wt%    | -19.5 °C | Angiosperm | Temperate                  | Spring            | Wind   | Moderate | 0    | 2000 | DS |
| <i>Musa rubra</i> Wall. ex Kurz                                                      | Musaceae       | Zingiberales | Kew Gardens<br>Glasshouses             | 01/09/21              | -23.8 °C /<br>2 wt%    | -26.7 °C | Angiosperm | Subtropical                | Year<br>round     | Animal | Moderate | 0    | 2100 | DS |
| <i>Narcissus papyraceus</i><br>subsp. <i>polyanthos</i> (Loisel.)<br>Asch. & Graebn. | Amaryllidaceae | Asparagales  | Kew Gardens<br>Glasshouses             | 02/12/21              | -23.8 °C /<br>0.2 wt%  | -21.2 °C | Angiosperm | Subtropical                | Autumn/<br>Winter | Animal | Moderate | 0    | 1200 | -- |
| <i>Nymphaea</i> 'Kew's<br>Stowaway Blues'                                            | Nymphaeaceae   | Nymphaeales  | Kew Gardens<br>Glasshouses             | 01/09/21              | -20.8 °C /<br>2 wt%    | -22.5 °C | Angiosperm | Cosmopolitan               | Summer            | Animal | ***      | ***  | ***  | -- |
| <i>Ostrya carpinifolia</i> Scop.                                                     | Betulaceae     | Fagales      | Wakehurst<br>Place                     | 04/04/23              | -14.5 °C /<br>2 wt%    | -15.4 °C | Angiosperm | Temperate                  | Spring            | Wind   | Moderate | 0    | 1300 | DS |
| <i>Picea abies</i> (L.) H.Karst.                                                     | Pinaceae       | Pinales      | Velechvín,<br>Czech Republic           | 06/05/17              | -17.8 °C /<br>2 wt%    | -20.7 °C | Gymnosperm | Temperate                  | Summer            | Wind   | High     | 0    | 2400 | DT |
| <i>Picea brachytyla</i> (Franch.)<br>E.Pritz.                                        | Pinaceae       | Pinales      | Kew Gardens                            | 02/06/21              | -15.7 °C /<br>2 wt%    | -18.1 °C | Gymnosperm | Temperate                  | Summer            | Wind   | High     | 1500 | 3500 | DT |
| <i>Pilgerodendron wififerum</i><br>(D.Don) Florin                                    | Cupressaceae   | Cupressales  | Wakehurst<br>Place                     | 04/04/23              | -17.6 °C /<br>2 wt%    | -18.9 °C | Gymnosperm | Temperate                  | Spring            | Wind   | Moderate | 0    | 1200 | -- |
| <i>Pinus contorta</i> var.<br><i>contorta</i>                                        | Pinaceae       | Pinales      | Wakehurst<br>Place                     | 19/05/22              | -18.2 °C /<br>2 wt%    | -19.4 °C | Gymnosperm | Temperate                  | Summer            | Wind   | Low      | 0    | 610  | DT |
| <i>Pinus coulteri</i> D.Don                                                          | Pinaceae       | Pinales      | Kew Gardens                            | 02/06/21              | -12.2 °C /<br>2 wt%    | -12.7 °C | Gymnosperm | Subtropical                | Spring            | Wind   | Moderate | 150  | 2120 | DT |
| <i>Pinus halepensis</i> Mill.                                                        | Pinaceae       | Pinales      | Alcoy, Spain                           | 17/03/21              | -16.6 °C /<br>2 wt%    | -19.7 °C | Gymnosperm | Temperate                  | Spring            | Wind   | Moderate | 250  | 2000 | DT |

|                                                            |                |             |                                        |                       |                       |          |            |              |                   |        |          |      |      |    |
|------------------------------------------------------------|----------------|-------------|----------------------------------------|-----------------------|-----------------------|----------|------------|--------------|-------------------|--------|----------|------|------|----|
| <i>Pinus mugo</i> Turra                                    | Pinaceae       | Pinales     | Warwick Univ.<br>Campus                | 24/05/23              | -7.6 °C /<br>2 wt%    | -8.7 °C  | Gymnosperm | Temperate    | Spring            | Wind   | High     | 200  | 2700 | DT |
| <i>Pinus ponderosa</i> Douglas<br>ex C.Lawson              | Pinaceae       | Pinales     | Lednice, Czech<br>Republic             | 25/04/16-<br>01/05/16 | -20.6 °C /<br>2 wt%   | -21.6 °C | Gymnosperm | Temperate    | Spring            | Wind   | High     | 0    | 3050 | DT |
| <i>Plantago lanceolata</i> L.                              | Plantaginaceae | Lamiales    | Wakehurst<br>Place                     | 30/06/21              | -18.1 °C /<br>0.2 wt% | -17.8 °C | Angiosperm | Temperate    | Summer            | Wind   | Low      | 0    | 800  | -- |
| <i>Quercus suber</i> L.                                    | Fagaceae       | Fagales     | Follonica, Italy                       | 10/05/21-<br>12/05/21 | -18.1 °C /<br>2 wt%   | -19.4 °C | Angiosperm | Temperate    | Spring            | Wind   | Low      | 0    | 1000 | DT |
| <i>Sambucus nigra</i> L.                                   | Adoxaceae      | Dipsacales  | Podivín, Czech<br>Republic             | 11/05/18-<br>12/05/18 | -12.21 °C<br>/ 2 wt%  | -14.4 °C | Angiosperm | Temperate    | Summer            | Animal | Moderate | 0    | 1500 | -- |
| <i>Sequoiadendron<br/>giganteum</i> (Lindl.)<br>J.Buchholz | Cupressaceae   | Cupressales | Leamington Spa                         | 28/02/21              | -11.63 °C<br>/ 2 wt%  | -12.6 °C | Gymnosperm | Temperate    | Autumn/<br>Winter | Wind   | High     | 830  | 2700 | -- |
| <i>Spathiphyllum wallisii</i><br>Regel                     | Araceae        | Alismateles | House plant                            | 28/11/21              | -21.2 °C /<br>2 wt%   | -22.3 °C | Angiosperm | Wet tropical | Year<br>round     | Animal | Moderate | 1465 | 1465 | -- |
| <i>Taxus baccata</i> L.                                    | Taxaceae       | Cupressales | Lednice, Czech<br>Republic             | 15/03/11-<br>16/03/11 | -18.9 °C /<br>2 wt%   | -20.3 °C | Gymnosperm | Temperate    | Spring            | Wind   | Moderate | 0    | 2200 | DT |
| <i>Triticum aestivum</i> L.                                | Poaceae        | Poales      | České<br>Budějovice,<br>Czech Republic | 12/06/20              | -18.0 °C /<br>2 wt%   | -19.4 °C | Angiosperm | Temperate    | Summer            | Wind   | High     | 2000 | 3000 | -- |

\* Country indicated if collection location outside the UK

\*\* Pharmallerga® collection, pollen purchased 2020, details lost.

\*\*\* Excluded from elevation analysis (artificial hybrid, data not available)

## 1 Pollen desiccation tolerance

We categorised the pollen of 39 species as desiccation tolerant (DT) or desiccation sensitive (DS), as shown in Table S1, based on information available for specific species, genera, families, or by closely related species (Brewbaker, 1967; Kuznecov, 1970; Bowes, 1990; Hoekstra, 2002; Galgóci et al., 2010; Franchi et al., 2011; Xu et al., 2014; Pacini and Dolferus, 2019). Where this information was not available species were not categorised.

## 2 All pollen ice nucleation results

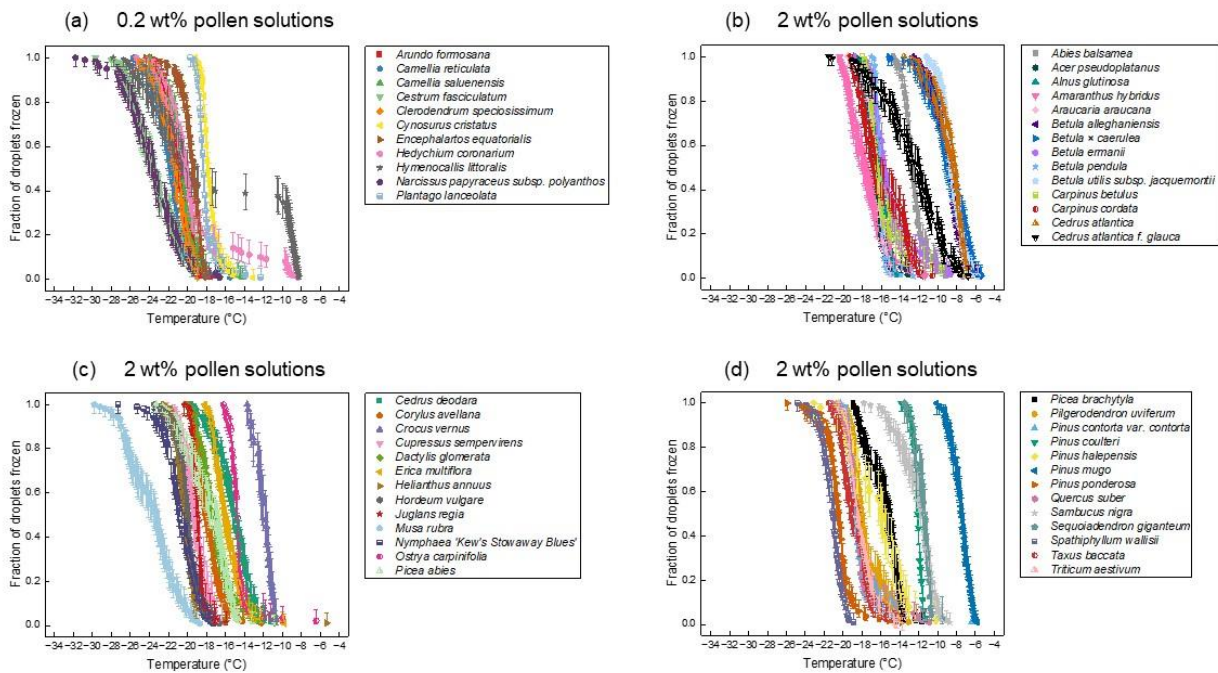

Figure S1: Fraction of droplets frozen plotted against temperature for one microlitre droplets of 51 filtered pollen solutions tested in immersion mode ice nucleation experiments, with (a) showing results for 0.2 wt% pollen solutions and (b), (c), (d) of 2 wt% pollen solutions.

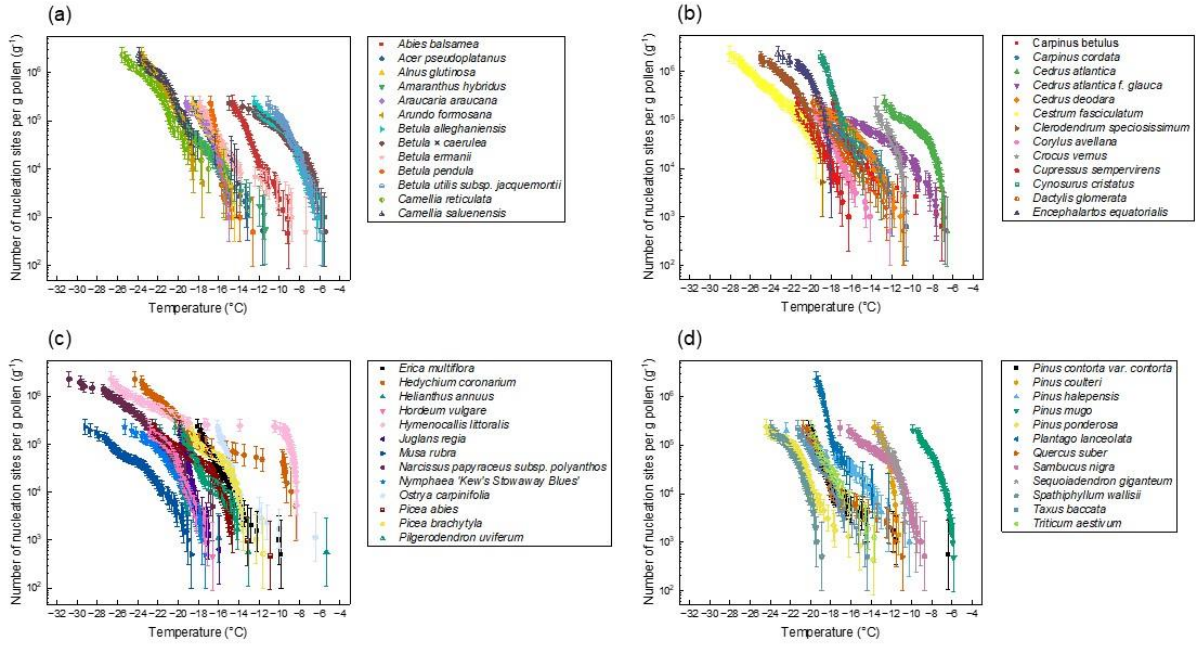

Figure S2: Number of nucleation sites per gram pollen ( $\text{g}^{-1}$ ) plotted against temperature for one microlitre droplets of 51 filtered pollen solutions tested in immersion mode ice nucleation experiments.

### 15 3 Pollen filtration time series results

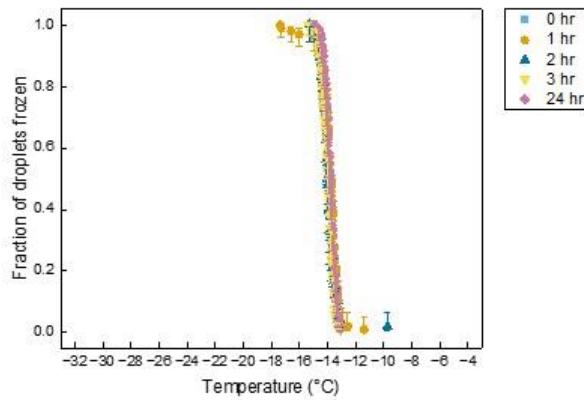

Figure S3: Fraction of droplets frozen plotted against temperature for one microlitre droplets of *Carpinus betulus* pollen solutions tested in immersion mode ice nucleation experiments, where filtration was carried out at time intervals from 0 hours to 24 hours following preparation of a 20 wt% pollen suspension.

20 **4 *Pinus mugo* collection results**

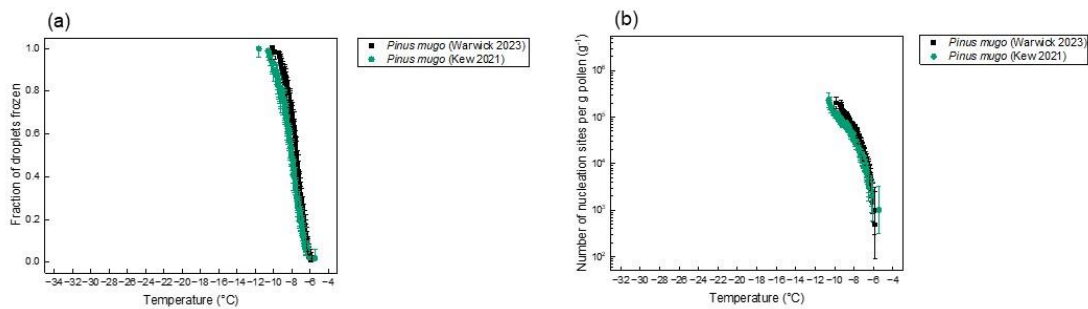

25 **Figure S4: Comparison of ice nucleation activity in collections of *Pinus mugo* pollen from the University of Warwick campus, Coventry (2023) and the Royal Botanic Gardens, Kew, London (2021). (a) Fraction of droplets frozen plotted against temperature for one microlitre droplets of filtered 2 wt% pollen solutions, (b) Number of nucleation sites per gram pollen (g<sup>-1</sup>) plotted against temperature for one microlitre droplets of filtered 2 wt% pollen solutions.**

**References**

Bowes, S. A.: Long-term storage of *Narcissus* anthers and pollen in liquid nitrogen, *Euphytica*, 48, 275–278, <https://doi.org/10.1007/BF00023661/METRICS>, 1990.

Brewbaker, J. L.: The Distribution and Phylogenetic Significance of Binucleate and Trinucleate Pollen Grains in the Angiosperms, *Am. J. Bot.*, 54, 1069–1083, <https://doi.org/10.1002/J.1537-2197.1967.TB10735.X>, 1967.

30 Franchi, G. G., Piotto, B., Nepi, M., Baskin, C. C., Baskin, J. M., and Pacini, E.: Pollen and seed desiccation tolerance in relation to degree of developmental arrest, dispersal, and survival, *J. Exp. Bot.*, 62, 5267–5281, <https://doi.org/10.1093/jxb/err154>, 2011.

Galgóci, M., Salaj, T., Hlinku, A., and Masaryka, T. G.: Longevity of *Abies* Pollen Under Deep-Freeze Storage, *Acta Pruhoniana*, 94, 35–38, 2010.

35 Hoekstra, F. A.: Pollen and spores: desiccation tolerance in pollen and the spores of lower plants and fungi., *Desiccation Surviv. plants Dry. without dying*, 185–205, <https://doi.org/10.1079/9780851995342.0185>, 2002.

Kuznecov, S. I.: Storage of pollen of *Cedrus* spp., *Bjulleten' Gl. Bot. Sada*, 98–100, 1970.

Pacini, E. and Dolferus, R.: Pollen Developmental Arrest: Maintaining Pollen Fertility in a World With a

40 Changing Climate, *Front. Plant Sci.*, 10, <https://doi.org/10.3389/FPLS.2019.00679>, 2019.

Xu, J., Li, B., Liu, Q., Shi, Y., Peng, J., Jia, M., and Liu, Y.: Wide-Scale Pollen Banking of Ornamental Plants Through Cryopreservation, *Cryoletters*, 35, 312–319, 2014.
