# Supplementary material for: High interspecific variability indicates pollen ice nucleators are incidental
Source: Copernicus journal article supplement (doi:10.5194/egusphere-2023-2705), 2024-01-02
Supplement: Supplementary file [file egusphere-2023-2705-AC1-supplement.pdf]

## Responses to RC1

We thank Professor Morris for her thoughtful comments and suggestions for improving the manuscript. The specific comments made (blue text) are each addressed below (black text) with corresponding changes to the manuscript included (red text).

Title: The title is not clear. Firstly, one might ask what variability. Secondly, it would be more appropriate to say “suggests” rather than “indicates”. A better title could be “High interspecific variability in ice nucleation activity suggests pollen ice nucleators are incidental”

Thank you – we agree and intend to change the article title to that suggested.

L 30. This is an outdated taxonomy. There are 3 domains of life: Eukaryotes, Prokaryotes and Archaea. Within the Eukaryotes there are 4 kingdoms: plants, animals, eumycota (true fungi) and the Stramenopila (formerly Chromista) that contain flagellated organisms. And, there are also the “non living” organisms, i.e. viruses, for which some have wondered about their ice nucleation activity. Taxonomy is always changing (see wikipedia for a summary of this change: [https://en.wikipedia.org/wiki/Kingdom\\_\(biology\)](https://en.wikipedia.org/wiki/Kingdom_(biology))). The number and names of the taxonomic divisions is not really pertinent to this work. I recommend simply stating that ice nucleation is wide spread across many different types of organisms and indicate examples.

We will replace the relevant section (L 29-33):

“Ice nucleators associated with representatives from all five kingdoms: animals (Duman, 1982; Layne and Lee, 1995), plants (Gross et al., 1988; Brush et al., 1994; Seifried et al., 2023) fungi (Kieft, 1988; Eufemio et al., 2023), protists (Ickes et al., 2020) and monera (Lindow et al., 1982; Maki et al., 1974; Lukas et al., 2022) have been identified. Expanding knowledge of these ice nucleators is of biological and atmospheric interest.”

with the following:

“The identification of ice nucleators associated with various organisms, from bacteria (Lindow et al., 1982; Maki et al., 1974; Lukas et al., 2022) to lichens (Kieft, 1988; Eufemio et al., 2023) and plants (Gross et al., 1988; Brush et al., 1994; Felgitsch et al., 2018), is of biological and atmospheric interest.”

L 39. This section describes pollen in terms of its chemistry. However, the authors suggest that knowledge about INA of pollen would have implications for atmospheric science. Hence, the authors should also tell the reader about the capacity for pollen to become airborne. Indeed, is all pollen meant to fly? Overall, the authors should introduce information about the biology and “life cycle” of pollen.

The following section will be added to the text (L 39) to better introduce different pollination strategies and the capacity for pollen to become airborne.

“Pollen grains are the male gametophytes of the seed plants or spermatophytes, a clade that is divided into gymnosperms (plants with unenclosed or “naked seeds”) and angiosperms (or flowering plants). Angiosperms predominantly rely on mutualistic relationships with animal pollinators for transporting pollen to the female stigma. There, pollen develops a pollinic tube that transports the spermatocytic nuclei into the ovule, where the female gametophyte is located

and fertilisation occurs, enabling the production of seeds. Anemophily (wind pollination) is the primary pollination method for most gymnosperms and around 10% of angiosperm species (Friedman and Barrett, 2009). Seasonally, anemophilous plants release large quantities of pollen into the air. Pollen grains and smaller pollen fragments are classed as primary biological aerosol particles and are known to disperse in the atmosphere (Després et al., 2012). Records of the long-distance transport of pollen and its presence in rain, hail and snow samples have appeared in historical literature (Bessey, 1883; Potter and Rowley, 1960; Gregory, 1961), pointing to the possible relevance of pollen for ice nucleation in mixed-phase clouds.”

L 39. Furthermore, in this section, here the authors indicate that ice nucleation activity is assessed from solutions of material that is washed from the pollen grains. This information needs to be emphasized to help readers understand that ice nucleation activity will NOT be assessed strictly on a per pollen grain basis via tests of suspensions of pollen grains. I had not paid attention to this detail in my first round of reading the manuscript and it threw me off – especially given that the Materials and Methods section comes after the Results section and that I have the unfortunate habit of reading a manuscript from beginning to end in the order that it is presented. Here in the introduction section it would be very useful to present information on the amount of INA material released per grain and if this is constant among plant species. This is critical information because, for pollen INA to be pertinent for the life history of a plant, it needs to function on a whole grain. In addition, even if the material in the washed-off form is active in cloud processes, it is unlikely that its distribution in the atmosphere is homogenous – it is more likely to follow the distribution of the pollen grains themselves. If the amount of INA material per g (or per grain) of pollen is very different among species, how can this be accounted for in the analyses and can the results be expressed on a per grain basis to allow for pertinent comparisons?

We thank Prof. Morris for highlighting that the method for preparing the pollen solutions should be more clearly emphasised earlier in the manuscript. We will clarify this in the Introduction – the paragraph beginning at L 39:

“It is established that the pollen of some plants releases water-soluble ice nucleating macromolecules (INMs) that can promote ice nucleation (Pummer et al., 2012; Dreischmeier et al., 2017). Pollen INMs readily separate from their parent pollen grains on suspension in water meaning that aqueous solutions of pollen INMs can be prepared straightforwardly (Pummer et al., 2012; Dreischmeier et al., 2017). Both the chemical nature and biological function of these INMs remains unclear, although it seems very likely that they are polysaccharides (Dreischmeier et al., 2017). Improved understanding of the biological function of pollen INMs would facilitate prediction of their likely spatial and temporal distribution in the atmosphere. There are two obvious hypotheses for the biological function of pollen INMs.”

will be changed to the following:

“It is established that the pollen of some plants release water-soluble ice nucleating macromolecules (INMs) that can promote ice nucleation (Pummer et al., 2012; Dreischmeier et al., 2017). The IN activity of pollen grains in suspension is found to agree with the IN activity of pollen solutions following removal of grains and insoluble fragments by filtration (Pummer et al., 2012; Dreischmeier et al., 2017; Gute and Abbatt, 2020), indicating that pollen INMs readily separate from their parent pollen grains on contact with water. The IN activity of pollen samples can therefore be evaluated by measuring nucleation temperatures of filtered pollen solutions. The quantity of soluble material in a filtered pollen solution has been recorded for a handful of pollen types (Pummer et al., 2012; Murray et al., 2022) but the proportion of this

material that nucleates ice is estimated to be far smaller (Murray et al., 2022). Both the chemical nature and biological function of these INMs remains unclear, although it seems very likely that they are polysaccharides (Dreischmeier et al., 2017). Improved understanding of the biological function of pollen INMs would facilitate prediction of their likely spatial and temporal distribution in the atmosphere. There are two obvious hypotheses for the biological function of pollen INMs.”

We will also add the following sentence at the start of the Results and Discussion section (L 92):

“We evaluate the IN activity of pollen solutions (also commonly referred to as pollen washing waters) which are prepared by filtering aqueous pollen suspensions, removing pollen grains and insoluble fragments and leaving only soluble extracts in solution.”

The concept of determining per grain activity is discussed further below, in response to the comment regarding L 356. Measurements of soluble material is discussed further in response to the comment on L 387.

L 84. The authors have written “measurements ..... has....”. Please correct the grammar.

We will correct this, thanks.

L 85. Here the authors mention pollination by animals. Some readers might be lost if there is not a presentation of the different types of pollen, as suggested above.

In our updated manuscript we will introduce this concept in the Introduction as suggested (see L 39 response).

L 216. Here the authors explain that their results do not support that the “underlying biological function” of pollen nucleating ice is a bioprecipitation mechanism. It might be more precise to state that their results do not support that “there is a positive selection pressure - for pollen in general - of rainfall on ice nucleation capacity. Ice nucleation might indeed be involved in depositing pollen from the atmosphere in some cases, but their results show that there is no signal of positive selection pressure for this across all of the different types of pollen and not for the wind-disseminated pollen in particular.

Agreed. We intend to replace the final sentence of this section (L 216-217):

“This strongly suggests that the underlying biological function of pollen nucleating ice is not, or at least not exclusively, a bioprecipitation mechanism.”

with the following:

“While ice nucleation may be involved in some cases in depositing pollen from the atmosphere, these results do not support that there is a positive selection pressure of precipitation on IN activity of pollen in general.”

L 291-296. In this paragraph the authors indicate that the microbiology of the pollen could be a factor in the ice nucleation activity. For pollen collected from outdoor sources, this is a real possibility. The authors could mention how they could have accounted for this factor i.e.

microbiological analyses). Furthermore, the comparable results for filtered and raw suspension is a strong suggestion that the INA they measure is not due primarily to the microflora of the pollen.

To better address these points the following section will be added to the text at L 296.

“Pollen solutions prepared from purchased pollen samples have previously been shown to be sterile with no microbial growth detected on agar jelly (Murray et al., 2022). Comparable results for filtered and unfiltered samples, where measured, also supports that the IN activity represented is not primarily due to the microflora of the pollen. However, because the majority of pollen samples used in this study were collected from outdoor sources, we cannot entirely discount the possibility that microbiological contamination may have contributed to the IN activity of some samples. As such, microbial analysis of pollen samples might be of value in the future.”

L 333. The authors state that droplet arrays were cooled at a rate of 2 °C/min. Why this rate of cooling? Does it correspond to the rate that the pollen INA materials would encounter in nature?

A constant cooling rate of 2 °C/min is in the range of likely cooling rates that water droplets in mixed-phase clouds might experience but hold no particular physical significance. This cooling rate is standard for microlitre droplet freezing experiments; it is slow enough to allow for accurate determination of droplet nucleation temperatures using this kind of set-up and fast enough that experiments can be conducted within a reasonable timeframe in the lab.

The following sentence will be added to L 333.

“This cooling rate was chosen for convenience and is similar to that used in many previous studies e.g. Whale (2024).”

L 356. The authors calculated the number of nucleation sites per gram pollen. Is it possible to calculate per pollen grain? Is the weight of pollen homogenous across plant species? Furthermore, is the weight of pollen stable for any given plant species or is it variable depending on environmental conditions? I would expect these topics to be addressed somewhere in the manuscript.

It is important to emphasise that in all studies of IN activity of pollen to date the nucleation temperatures of droplets of pollen suspensions (unfiltered) are found to be consistent with the nucleation temperatures of droplets of pollen solutions (filtered), as discussed in Section 2.10.

When pollen grains are added to water the INMs seem to completely separate from their parent grains and disperse in solution (Pummer et al., 2012; Burkart et al., 2021). For this reason, the activity of filtered pollen solutions is representative of the pollen grain activity, in environments where pollen grains encounter water. Filtered pollen solutions are preferable for conducting droplet freezing experiments for ease of handling and in detecting the change in droplet opacity corresponding to nucleation temperature; in cloudy, typically yellow, pollen suspensions with clumps of grains the change is less clearly visible. Filtration also has the advantage of removing larger potential contaminants.

The mass of pollen is not consistent across species; the grain size and shape, exine thickness, water content and biochemical composition will differ between species as well as during pollen development. Generally, the pollen of anemophilous plants is lighter, facilitating wind dispersal,

and that of animal pollinated plants heavier. We cannot therefore calculate the number of nucleation sites per pollen grain directly from the mass of collected pollen. Pollen grain mass is also often not recorded in online pollen databases (such as <https://www.palдат.org/>).

The quantity of INMs generated by an individual pollen grain will be highly variable, depending exposure to conditions (e.g. humidity) and atmospheric lifetime. In principle an estimate of number of pollen grains in a given mass could be made by counting grains for each pollen type, however it would be difficult to interpret a meaningful 'per grain' activity relating to the potential activity in nature directly from this.

L 387 and onward. In the Conclusion, could the authors discuss the plasticity of plants in terms of the amount of INA polysaccharide that it produces on pollen grains? Is this is stable trait? Is it susceptible to environmental conditions and which ones? This could give insight into the differences observed between species even if the role of the trait is incidental concerning ice nucleation per se

The questions highlighted here are particularly pertinent and the answers not yet known but we have included some discussion below and intend to address this in the updated manuscript (Section 2.10), as suggested, to further reflect on these ideas. Ultimately, this presents a great challenge to measure and we cannot currently explain why the quantity of INMs varies per pollen grain or between pollen types. Learning more about the molecules responsible for this activity will help to shed light on this.

We can, given sufficient quantities of pollen, measure the quantity of soluble material in a filtered pollen solution by freeze-drying and then weighing the dried component as highlighted by Prof. Grothe. This allows for the mass of soluble material generated from a given mass of pollen to be determined. Although it does not provide information on the proportion of the soluble material that is the active component, this potentially better represents the quantity of INMs in each solution than the mass of pollen used for the starting suspension does.

The mass of soluble material has previously been measured for *Betula pendula* and *Carpinus betulus* pollen. It was estimated that ~37% of *B. pendula* pollen mass and 33% of the *C. betulus* pollen mass was soluble. In the current study we have not measured the mass of soluble material due to the limited quantities of pollen obtained from our collections. The material that remained after drying solutions of *Pinus ponderosa*, *Betula pendula*, and *Sambucus nigra* which we used for FTIR absorption measurements was too little to weigh on a standard lab balance. A higher volume of starting material would be needed to determine the percentage of pollen mass of the soluble components.

It would be interesting to compare the amount of soluble material generated from more diverse pollen types but the implications are limited in that the relative proportion of INMs within this quantity is unknown. These solutions contain a complex mix of proteins and polysaccharides, with variable structures and sizes (Pummer et al., 2013; Dreischmeier et al., 2017). Based on an estimation of mean molecular mass of soluble components, from mass concentration and osmolarity of the solution, Murray et al. (2022) suggested that the INMs comprise only a small proportion of the soluble material extracted from pollen. The soluble content of pollen solutions could be separated by size which would help to isolate the INMs but still larger volumes of pollen would be needed to produce concentrations sufficient for this analysis.

It is worth noting that the *Pinus mugo* collection results, where pollen from this species was collected in different locations in different years and demonstrates remarkably consistent IN

activity, does imply that using the same concentration of pollen in suspension can represent concentration of INMs, at least within a species.

To reflect on this more clearly in the text, as well as related points made by Prof. Grothe, we intend to add the following section to Section 2.10:

“Animal-pollinated plants can afford to allocate a lesser proportion of their resources to pollen production than wind-pollinated plants; plant-pollinator relationships ensure a higher likelihood that an individual pollen grain will reach the stigma of another plant and result in fertilisation (Herrera and Pellmyr, 2002). Therefore, it is challenging to collect large quantities of pollen from many animal-pollinated species without extensive harvesting of flowers. In this study, we prioritised nucleation temperature measurements which allowed a broad comparison of pollen from diverse plant species to be made. Limits on pollen quantities for some species restricted possibilities for further analysis, such as evaluating the quantity and composition of soluble material in each of the pollen solutions.

We have controlled for the mass of pollen added to a volume of water and time-in-suspension in an attempt to ensure consistency across the pollen samples tested, but this is not a direct measure of the concentration of INMs in each solution. Murray et al. (2022) compared the mass of dried soluble material from solutions of *Carpinus betulus* and *Betula pendula* pollen solutions, finding that for both types approximately 0.7% of the total mass of the samples was soluble material from pollen. However, even the quantity of soluble material is a proxy for the quantity of the INM component, which is estimated to be far smaller (Murray et al., 2022). That the activity of *Pinus mugo* pollen collected from plants in different locations, in different years, was so similar would seem to indicate the measurements carried out are in some capacity representative of the true pollen activity. Ultimately, these ambiguities highlight, in our view, the importance of work towards identifying the structure of the molecules responsible for the IN activity in pollen.”

## References

- Bessey, C. E.: Remarkable fall of pine pollen, *Am. Nat.*, 17, 658–658, <https://doi.org/10.1086/273405>, 1883.
- Brush, R. A., Griffith, M., and Mlynarz, A.: Characterization and Quantification of Intrinsic Ice Nucleators in Winter Rye (*Secale cereale*) Leaves', *Plant Physiol*, 104, 725–735, 1994.
- Burkart, J., Seifried, T. M., Bieber, P., and Grothe, H.: Subpollen particles ( SPP ) of birch as carriers of ice nucleating macromolecules, 3, 1–15, 2021.
- Després, V. R., Alex Huffman, J., Burrows, S. M., Hoose, C., Safatov, A. S., Buryak, G., Fröhlich-Nowoisky, J., Elbert, W., Andreae, M. O., Pöschl, U., and Jaenicke, R.: Primary biological aerosol particles in the atmosphere: a review, *Stock. Uni Press*, 64, <https://doi.org/10.3402/TELLUSB.V64I0.15598>, 2012.
- Dreichmeier, K., Budke, C., Wiehemeier, L., Kottke, T., and Koop, T.: Boreal pollen contain ice-nucleating as well as ice-binding “antifreeze” polysaccharides, *Sci. Rep.*, 7, 1–13, <https://doi.org/10.1038/srep41890>, 2017.
- Duman, J. G.: Insect antifreezes and ice-nucleating agents, *Cryobiology*, 19, 613–627, [https://doi.org/10.1016/0011-2240\(82\)90191-2](https://doi.org/10.1016/0011-2240(82)90191-2), 1982.
- Eufemio, R. J., de Almeida Ribeiro, I., Sformo, T. L., Laursen, G. A., Molinero, V., Fröhlich-Nowoisky, J., Bonn, M., and Meister, K.: Lichen species across Alaska produce highly active and stable ice nucleators, *Biogeosciences*, 20, 2805–2812, <https://doi.org/10.5194/BG-20->

2805-2023, 2023.

Felgitsch, L., Baloh, P., Burkart, J., Mayr, M., Momken, M. E., Seifried, T. M., Winkler, P., Schmale, D. G., and Grothe, H.: Birch leaves and branches as a source of ice-nucleating macromolecules, *Atmos. Chem. Phys.*, 18, 16063–16079, <https://doi.org/10.5194/acp-18-16063-2018>, 2018.

Friedman, J. and Barrett, S. C. H.: Wind of change: new insights on the ecology and evolution of pollination and mating in wind-pollinated plants, *Ann. Bot.*, 103, 1515–1527, <https://doi.org/10.1093/AOB/MCP035>, 2009.

Gregory, P. H.: *The microbiology of the atmosphere*, Leonard Hill Books, 1961.

Gross, D. C., Proebsting, E. L., and Maccrindle-Zimmerman, H.: Development, Distribution, and Characteristics of Intrinsic, Nonbacterial Ice Nuclei in Prunus Wood, *Plant Physiol.*, 88, 915–922, <https://doi.org/10.1104/PP.88.3.915>, 1988.

Gute, E. and Abbatt, J. P. D.: Ice nucleating behavior of different tree pollen in the immersion mode, *Atmos. Environ.*, 231, <https://doi.org/10.1016/j.atmosenv.2020.117488>, 2020.

Herrera, C. M. and Pellmyr, O.: *Plant Animal Interactions: An Evolutionary Approach*, John Wiley & Sons, 2002.

Ickes, L., Porter, G. C. E., Wagner, R., Adams, M. P., Bierbauer, S., Bertram, A. K., Bilde, M., Christiansen, S., Ekman, A. M. L., Gorokhova, E., Höhler, K., Kiselev, A. A., Leck, C., Möhler, O., Murray, B. J., Schiebel, T., Ullrich, R., and Salter, M. E.: The ice-nucleating activity of Arctic sea surface microlayer samples and marine algal cultures, *Atmos. Chem. Phys.*, 20, 11089–11117, <https://doi.org/10.5194/ACP-20-11089-2020>, 2020.

Kieft, T. L.: Ice nucleation activity in lichens, *Appl. Environ. Microbiol.*, 54, 1678–1681, <https://doi.org/10.1128/AEM.54.7.1678-1681.1988>, 1988.

Layne, J. R. and Lee, R. E.: Adaptations of frogs to survive freezing, *Clim. Res.*, 5, 53–59, 1995.

Lindow, S. E., Arny, D. C., and Upper, C. D.: Bacterial Ice Nucleation: A Factor in Frost Injury to Plants, *Plant Physiol.*, 70, 1084–1089, <https://doi.org/10.1104/PP.70.4.1084>, 1982.

Lukas, M., Schwidetzky, R., Eufemio, R. J., Bonn, M., and Meister, K.: Toward Understanding Bacterial Ice Nucleation, *J. Phys. Chem. B*, 126, 1861–1867, [https://doi.org/10.1021/ACS.JPCB.1C09342/ASSET/IMAGES/LARGE/JP1C09342\\_0004.JPEG](https://doi.org/10.1021/ACS.JPCB.1C09342/ASSET/IMAGES/LARGE/JP1C09342_0004.JPEG), 2022.

Maki, L. R., Galyan, E. L., Chang-Chien, M.-M., and Caldwell, D. R.: Ice nucleation induced by *Pseudomonas syringae*, *Appl. Microbiol.*, 28, 456–459, <https://doi.org/10.1128/AM.28.3.456-459.1974>, 1974.

Murray, K. A., Kinney, N. L. H., Griffiths, C. A., Hasan, M., Gibson, M. I., and Whale, T. F.: Pollen derived macromolecules serve as a new class of ice-nucleating cryoprotectants, *Sci. Reports* 2022 121, 12, 1–11, <https://doi.org/10.1038/s41598-022-15545-4>, 2022.

Potter, L. D. and Rowley, J.: *Pollen Rain and Vegetation, San Augustin Plains, New Mexico*, *Gazette*, 122, 1–25, 1960.

Pummer, B. G., Bauer, H., Bernardi, J., Bleicher, S., and Grothe, H.: Suspendable macromolecules are responsible for ice nucleation activity of birch and conifer pollen, *Atmos. Chem. Phys.*, 12, 2541–2550, <https://doi.org/10.5194/acp-12-2541-2012>, 2012.

Pummer, B. G., Bauer, H., Bernardi, J., Chazallon, B., Facq, S., Lendl, B., Whitmore, K., and Grothe, H.: Chemistry and morphology of dried-up pollen suspension residues, *J. Raman Spectrosc.*, 44, 1654–1658, <https://doi.org/10.1002/jrs.4395>, 2013.

Seifried, T. M., Reyzek, F., Bieber, P., and Grothe, H.: Scots Pines (*Pinus sylvestris*) as Sources of Biological Ice-Nucleating Macromolecules (INMs), *Atmos.* 2023, Vol. 14, Page 266, 14, 266, <https://doi.org/10.3390/ATMOS14020266>, 2023.

Whale, T. F.: Quantification of the Ice Nucleation Activity of Ice-Binding Proteins Using a Microliter Droplet Freezing Experiment, *Methods Mol. Biol.*, 2730, 121–134, [https://doi.org/10.1007/978-1-0716-3503-2\\_9/FIGURES/5](https://doi.org/10.1007/978-1-0716-3503-2_9/FIGURES/5), 2024.
